# Supplementary material for: Topology and giant circular dichroism of enantiomorphic Kagome bands in a designed covalent organic framework
Source: Royal Society of Chemistry journal article supplement (doi:10.1039/d4cp00882k), 2024-01-01
Supplement: d4cp00882k1.pdf [file d4cp00882k1.pdf]

## Electronic Supplementary Information for Topology and Giant Circular Dichroism of Enantiomorphic Kagome Bands in a Designed Covalent Organic Framework

Quan Gao,<sup>a</sup> Lei Yang,<sup>a</sup> Zhikuan Wang,<sup>a</sup> Dongmei Li,<sup>a</sup> Bin Cui,<sup>\*a</sup> and Desheng Liu<sup>†ab</sup>

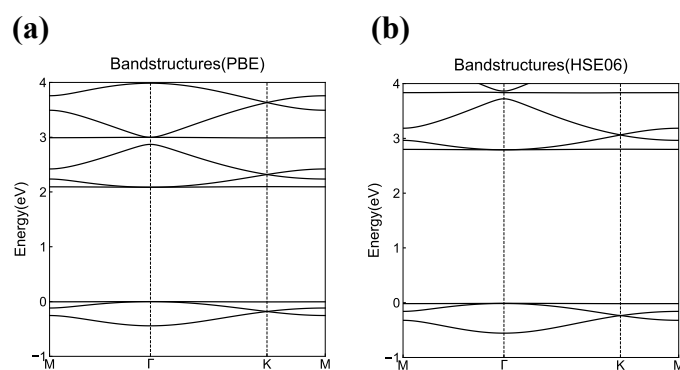

**Fig. S1.** (a) Band structures calculated with PBE exchange-correlation functional. (b) Band structures calculated with HSE06 exchange-correlation functional.

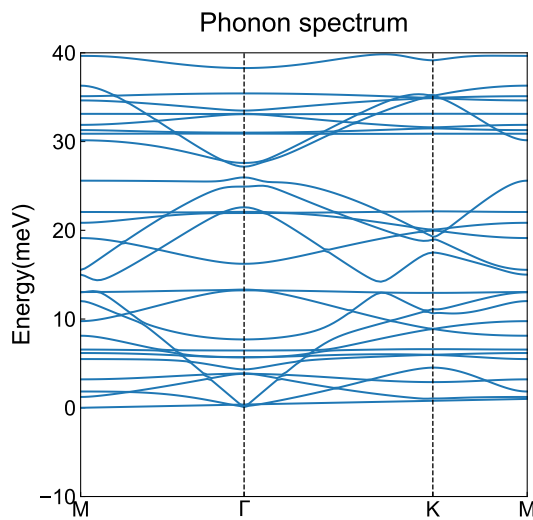

**Fig. S2.** Phonon spectrum of AB-COF lattice

<sup>a</sup> School of Physics, National Demonstration Center for Experimental Physics Education, Shandong University, Jinan 250100, China.

<sup>b</sup> Department of Physics, Jining University, Qufu 273155, China.

\* Email: cui bin@sdu.edu.cn

† Email: liuds@sdu.edu.cn

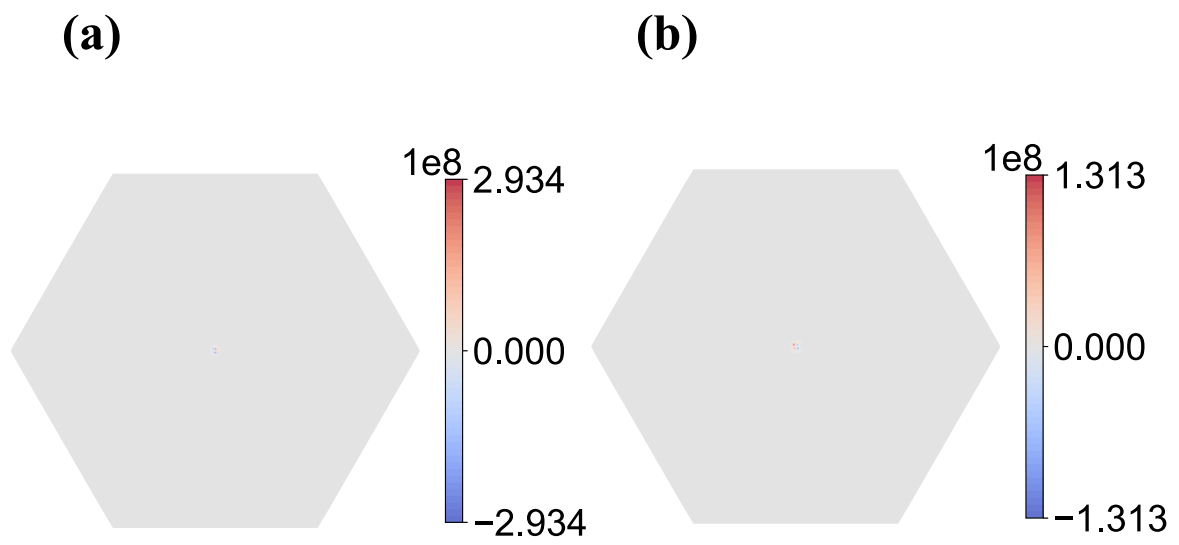

**Fig. S3.** For undoped system, (a) is Berry curvature of the flat valence band. (b) is Berry curvature of the flat conduction band.
